# Supplementary material for: Expression and protease characterization of a conserved protein YgjD in Vibrio harveyi
Source: PeerJ. 2020 May 18;8:e9061. doi: 10.7717/peerj.9061 (PMC7241418; doi:10.7717/peerj.9061)
Supplement: Data S3 [file peerj-08-9061-s003.xlsx]

## Sheet: Sheet1
Effects of metal ions and chemical agents on activities of the purified recombinant YgjD
Chemical Reagents	Concentrations (mM)	OD600			Concentrations (mM)	OD600
Normal saline	/	0.162	0.16	0.164	/	0.161	0.169	0.165
Zn2+	0.1	0.261	0.248	0.251	1	0.416	0.398	0.356
Mg2+	0.1	0.161	0.167	0.167	1	0.163	0.161	0.156
Co2+	0.1	0.164	0.149	0.143	1	0.136	0.118	0.127
Ca2+	0.1	0.151	0.137	0.143	1	0.151	0.133	0.136
Cu2+	0.1	0.102	0.091	0.093	1	0.126	0.141	0.125
Mn2+	0.1	0.078	0.095	0.079	1	0.063	0.059	0.058
EDTA	0.1	0.121	0.124	0.113	1	0.098	0.087	0.089
EGTA	0.1	0.097	0.081	0.074	1	0.119	0.111	0.103
DTT	0.1	0.138	0.151	0.155	1	0.163	0.157	0.161
PMSF	0.1	0.083	0.071	0.081	1	0.054	0.068	0.061
