# Supplementary material for: Expression and protease characterization of a conserved protein YgjD in Vibrio harveyi
Source: PeerJ. 2020 May 18;8:e9061. doi: 10.7717/peerj.9061 (PMC7241418; doi:10.7717/peerj.9061)
Supplement: Data S4 [file peerj-08-9061-s004.xlsx]

## Sheet: Sheet1
The enzymatic activities of the wild-type and mutant YgjD
Proteins	Substrates	OD
YgjD	BAPNA	0.017	0.016	0.016
	ATEE	0.053	0.064	0.061
	BTEE	0.052	0.056	0.053
H111A	BAPNA	0	0	0
	ATEE	0.059	0.061	0.073
	BTEE	0.024	0.027	0.025
E113A	BAPNA	0.011	0.013	0.014
	ATEE	0.043	0.036	0.044
	BTEE	0	0	0
H115A	BAPNA	0.016	0.018	0.021
	ATEE	0	0	0
	BTEE	0	0	0
H111A+H115A	BAPNA	0	0	0
	ATEE	0	0	0
	BTEE	0	0	0
