# Supplementary material for: Expression and protease characterization of a conserved protein YgjD in Vibrio harveyi
Source: PeerJ. 2020 May 18;8:e9061. doi: 10.7717/peerj.9061 (PMC7241418; doi:10.7717/peerj.9061)
Supplement: Supplemental Information 6 [file peerj-08-9061-s006.xlsx]

## Sheet: Sheet1
The data of protease activities using azocasein as substrate
Name	Data			U/mg
Sterile water	0.054	0.057	0.055
Inactivated protein	0.059	0.061	0.061
YgjD	0.057	0.055	0.057	/
H111A	0.049	0.053	0.052	/
E113A	0.051	0.059	0.058	/
H115A	0.057	0.059	0.057	/
H111A+H115A	0.053	0.058	0.058	/
